# Supplementary material for: An abdominal obesity missense variant in the adipocyte thermogenesis gene TBX15 is implicated in adaptation to cold in Finns
Source: PubMed Central journal article supplement (PMC11568758; doi:10.1016/j.ajhg.2024.10.001), 2024-11-07
Supplement: mmc1.pdf [file mmc1.pdf]

**The American Journal of Human Genetics, Volume 111**

**Supplemental information**

**An abdominal obesity missense variant in the  
adipocyte thermogenesis gene *TBX15* is implicated  
in adaptation to cold in Finns**

**Milena Deal, Asha Kar, Seung Hyuk T. Lee, Marcus Alvarez, Sandhya Rajkumar, Uma Thanigai Arasu, Dorota Kaminska, Ville Männistö, Sini Heinonen, Birgitta W. van der Kolk, Ulla Säiläkivi, Tuure Saarinen, Anne Juuti, Jussi Pihlajamäki, Minna U. Kaikkonen, Markku Laakso, Kirsi H. Pietiläinen, and Päivi Pajukanta**

## Supplemental Figures

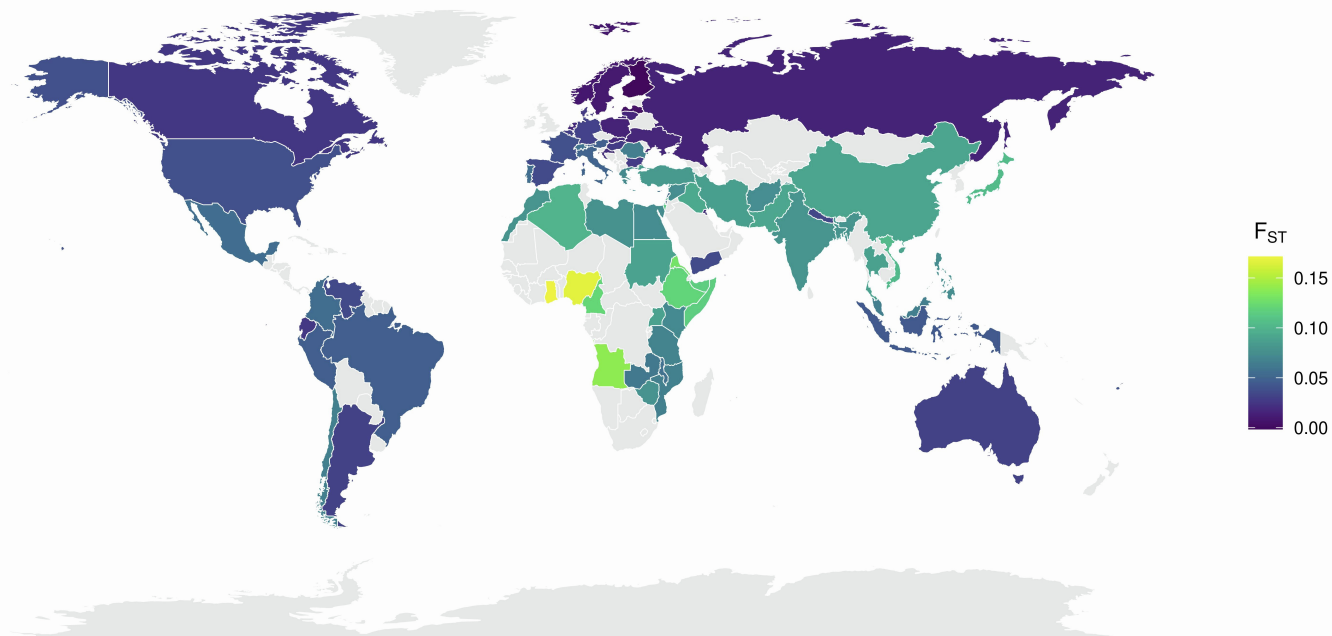

**Figure S1. Increased  $F_{ST}$  values indicate differences in allele frequency between Finns and populations closer to the equator.**  $F_{ST}$ , fixation index, of rs10494217 between the Finns in METSIM ( $n=6,738$ ) and the populations in UKB with  $n>30$ .

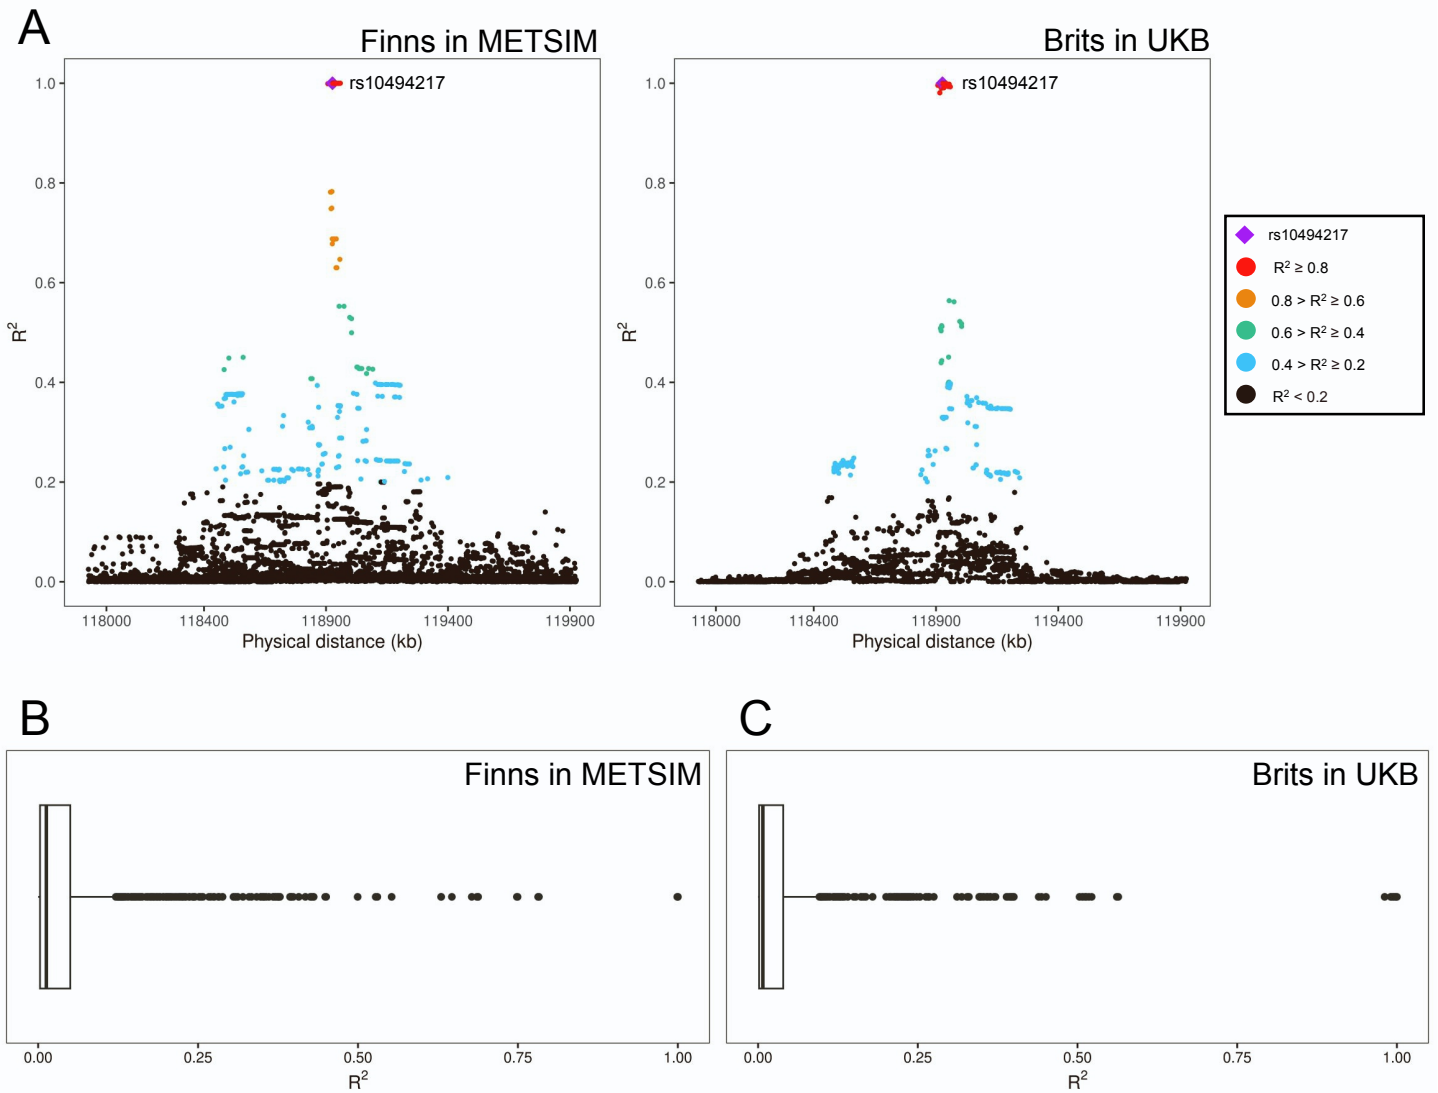

**Figure S2. Linkage disequilibrium (LD) between rs10494217 and nearby SNPs differs between the Finns and Brits.** LD was calculated for all SNPs residing within 1 Mb on each side of rs10494217. LD was calculated using the unrelated Finns from METSIM ( $n=6,738$ ) and Brits from the UK Biobank (UKB) ( $n=6,738$ ). A) LD is shown for 1 Mb on each side of rs10494217 for the Finns from METSIM and Brits from UKB. Boxplot of the LD between rs10494217 and the SNPs within 1 Mb of rs10494217 on either side for B) the Finns from METSIM and C) the Brits from UKB. The  $P$  for the difference in LD of rs10494217 and the SNPs extending 1 Mb on each side of rs10494217 between the Finns and Brits is  $1.31 \times 10^{-41}$ , with the stronger LD observed in the Finns.
